# Supplementary material
Source: PubMed Central journal article supplement (PMC2517610)
Supplement: NIHMS51773-supplement-01.pdf [file NIHMS51773-supplement-01.pdf]

## Supplemental Data

### Local Actin-Dependent Endocytosis Is Zygotically Controlled to Initiate *Drosophila* Cellularization

Anna Marie Sokac and Eric Wieschaus

#### Supplemental Experimental Procedures

##### Flies and Genetics.

The *nulloX* (X) embryos were collected from the C(1)DX, *ywf* stock (Wieschaus and Sweeton, 1988). The *nullo* gain-of-function embryos and imaginal wing discs were generated by crossing males homozygous for *UASnullo-HA3A* (Hunter and Wieschaus, 2000) with females homozygous for *mat $\alpha$ 4-GAL-VP16* (II and III) or females homozygous for *ptc559.1-GAL* (II), respectively. The Dynamin perturbation used *shi<sup>ts1</sup>* (Sweitzer and Hinshaw, 1998). Fixed *nulloX* embryos were genotyped by absence of Runt expression. The *nullo* gain-of-function embryos were genotyped by presence of HA expression. Fluorescent protein-tagged stocks were UASGFP-Clathrin light chain (Chang et al., 2002), UASVenus-GAP43 (Mavrakis and Lippincott-Schwartz, unpublished data), Histone-GFP and UASGFP-2xFYVE (Wucherpfennig et al., 2003).

**Table S1. Primary and Secondary Antibody Concentrations**

| <b>Antibody</b>                     | <b>Fixation</b>  | <b>Concentration</b> | <b>Source</b>                                |
|-------------------------------------|------------------|----------------------|----------------------------------------------|
| M anti-Null0                        | Heat             | 1:5                  | Postner and Wieschaus                        |
| R anti-Myosin-2<br>(Zipper)         | Heat             | 1:1000               | Sokac and Wieschaus                          |
| Rt anti-HA                          | Heat             | 1:50                 | Roche Molecular Biochemicals                 |
| GP anti-Runt                        | Heat             | 1:500                | Gift of C. Alonso and J. Reinitz             |
| M anti-Septin<br>4C9H4 (Peanut)     | Form.            | 1:5                  | Developmental Study<br>Hybridoma Bank (DSHB) |
| R anti-Amph                         | Form.            | 1:1400               | Gift of G. Boulianne<br>and H. McMahon       |
| M anti-DPATJ                        | Form.            | 1:1000               | Gift of M. Bhat                              |
| R anti-GFP                          | Form.            | 1:2000               | Torrey Pines Labs                            |
| M anti-Dynamin                      | Form.            | 1:500                | BD Transduction Laboratories                 |
| M anti-Phospho<br>Tyrosine (PY20)   | Form.            | 1:5                  | Santa Cruz Biotechnology                     |
| G anti-M, R, Rt, or<br>GP Alexa-488 | Heat or<br>Form. | 1:1000               | Invitrogen-Molecular Probes                  |
| G anti-M, R, Rt, or<br>GP Alexa-546 | Heat or<br>Form. | 1:1000               | Invitrogen-Molecular Probes                  |

M, mouse; R, rabbit; Rt, rat; GP, guinea pig; G, goat; Form., 4% formaldehyde

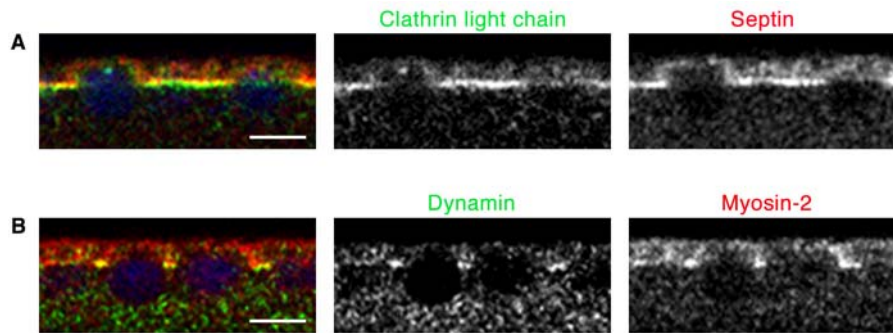

**Figure S1.** Endocytic Machinery Localizes to Somatic Bud Margins at Early Mitotic Cycles

(A-B) Cross-sections from embryos at mitotic cycle 13. (A) Clathrin light chain (green) concentrates with Septin (red) at somatic bud margins. (B) Dynamin (green) concentrates with Myosin-2 (red) at somatic bud margins. Bars are 5  $\mu\text{m}$ .

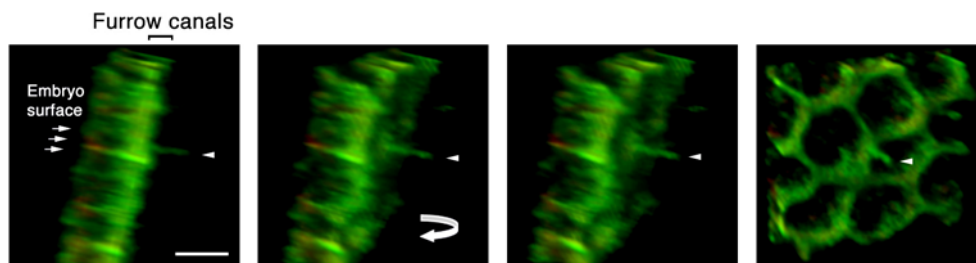

**Figure S2.** Amph Structures Are Tubules, Not Sheets

Rotation of a volumetric rendering shows an Amph structure (green; arrowhead) hanging below the dense plane of the furrow canal network. The structure is a tubule. This Amph tubule is the same one shown in Figure 3B and 3D. See Movie S1. Bar is 5  $\mu\text{m}$ .

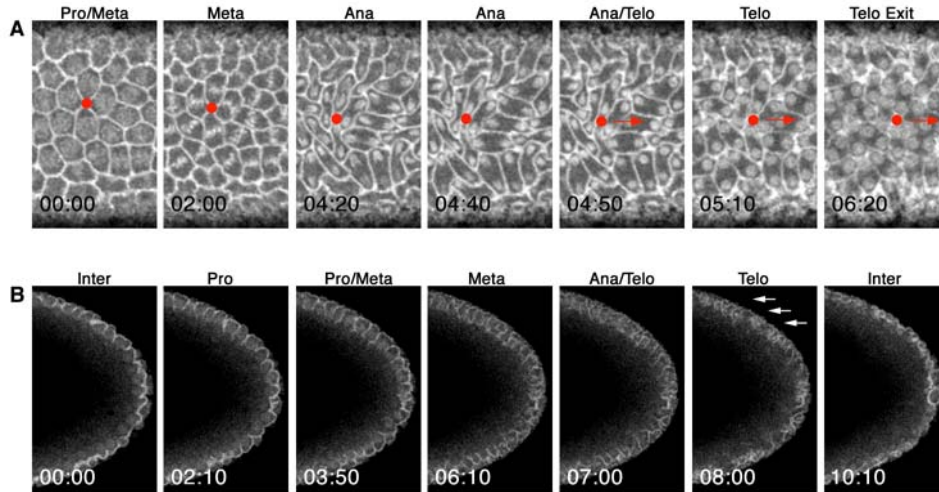

**Figure S3.** Maximum Cortical Displacement Coincides with Metaphase Furrow Regression at Late Anaphase/Telophase

(A, B) Time-lapse of cycle 13 embryos expressing histone-GFP and Venus-GAP43 to detect DNA and PM dynamics, respectively. The 00:00 time point was set arbitrarily (min:sec). (A) In single-plane *en face* images at mitosis, a cortical spot is followed (red dot), which marks the vertices of four “cells”. This spot undergoes maximum displacement (red arrow) along the anterior/posterior axis during late anaphase/telophase when metaphase furrows regress. After regression, furrows are no longer visible at this plane. See Movie S5. (B) Cross-sections show metaphase furrows ingress at prophase/metaphase then regress at late anaphase/telophase. Furrow regression coincides with maximum cortical displacement along the anterior/posterior axis (arrows). See Movie S6.

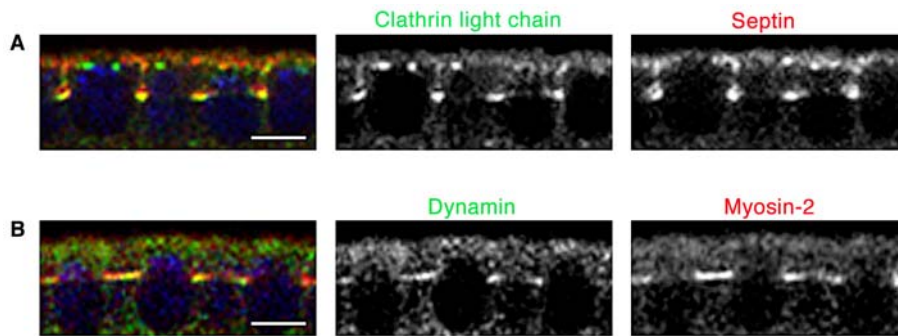

**Figure S4.** Endocytic Machinery Localizes to Furrows Tips at Early Cellularization

(A-B) Cross-sections from embryos at early cellularization. (A) Clathrin light chain (green) concentrates with Septin (red) at furrow tips. The Clathrin light chain/GFP fusion also localizes to centrosomes, which sit above the nuclei (blue). (B) Dynamin (green) concentrates with Myosin-2 (red) at furrow tips. Bars are 5  $\mu\text{m}$ .

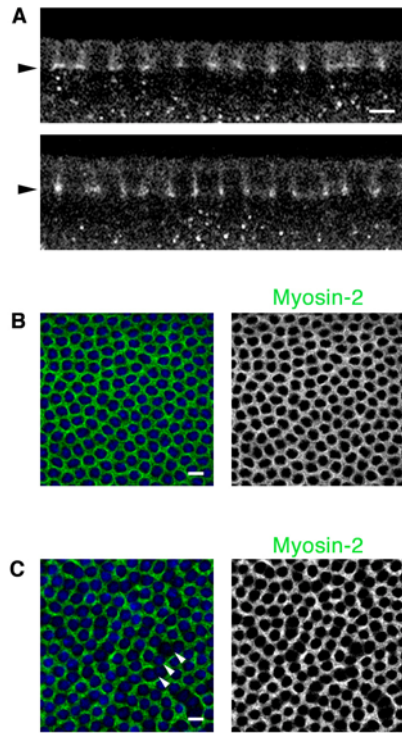

**Figure S5.** Nullo Localizes to Furrows Tips at Early Cellularization and Is Required for Furrow Canal Assembly

(A) Cross-sections show Nullo concentrates at furrow tips (level indicated by arrowheads). (B) En face images of wild-type furrow canals show Myosin-2 (green) accumulates between every nucleus (blue) to form a continuous network. (C) En face images of *nulloX* furrow canals show Myosin-2 (green) depleted between some nuclei (blue), creating gaps in the network (arrowheads). Bars are 5  $\mu\text{m}$ .

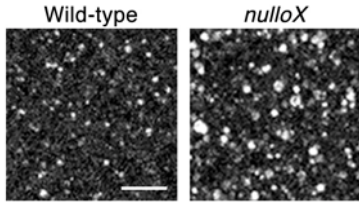

**Figure S6.** Early Endosomes Are Enlarged in *nulloX* Embryos

En face images show larger early endosomes (FYVE-GFP; green) in *nulloX* embryos compared to wild-type. Bar is 5  $\mu$ m.

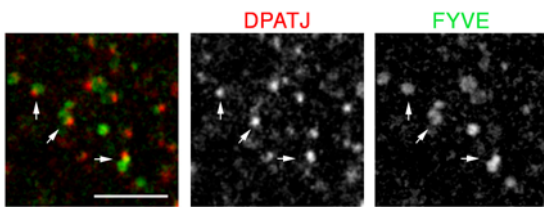

**Figure S7.** DPATJ Associates with Early Endosomes

En face images from *nulloX* embryos show DPATJ (red) at early endosomes (FYVE-GFP; green) in *nulloX* embryos. Bar is 5  $\mu$ m.
